# Supplementary material for: The nonlinear optical transition bleaching in tellurene
Source: Royal Society of Chemistry journal article supplement (doi:10.1039/d1nr03639d), 2021-01-01
Supplement: d1nr03639d1.pdf [file d1nr03639d1.pdf]

## Supporting information

# The Nonlinear Optical Transition Bleaching in Tellurene

**Yiduo Wang<sup>1</sup>, Yingwei Wang<sup>1\*</sup>, Yulan Dong<sup>2\*</sup>, Li Zhou, Hao Wei, Mengqiu Long,  
Si Xiao<sup>1</sup>, Jun He<sup>1\*</sup>**

*<sup>1</sup>Hunan Key Laboratory of Nanophotonics and Devices, School of Physics and Electronics, Central South University, 932 South Lushan Road, Changsha, Hunan 410083, P. R. China.*

*<sup>2</sup>Key Laboratory of Hunan Province for Statistical Learning and Intelligent Computation, School of Mathematics and Statistics, Hunan University of Technology and Business, Changsha, Hunan 410205, China. Corresponding author: [\\*wyw1988@csu.edu.cn](mailto:wyw1988@csu.edu.cn); [\\*yldong@csu.edu.cn](mailto:yldong@csu.edu.cn); [\\*junhe@csu.edu.cn](mailto:junhe@csu.edu.cn);*

## **CONTENTS**

Note S1. OA Z-scan results of tellurene with different wavelength

Note S2. Calculation of carrier intensity

Note S3. Density of states of tellurene

# Note S1. OA Z-scan results of tellurene with different wavelength

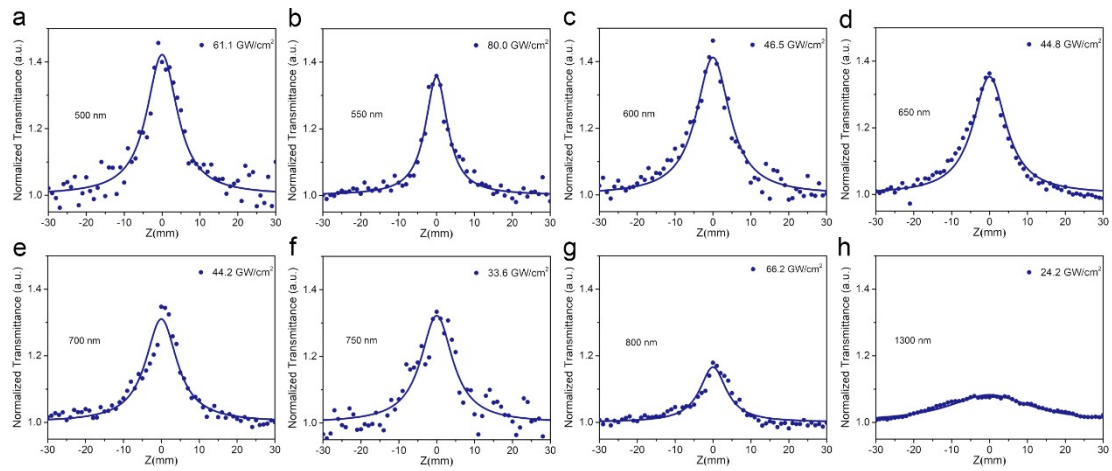

**Figure S1.** OA Z-scan results of tellurene with the wavelength of (a) 500nm, (b) 550nm, (c) 600nm, (d) 650nm, (e) 700nm, (f) 750nm, (g) 800nm and (h) 1300nm.

## Note S2. Calculation of carrier intensity

To calculate the carrier intensity excited by pump beam, the laser pulse energy  $E$ , linear absorption coefficient  $\alpha$ , photon energy  $h\nu$  and excitation volume  $V$  should be included:

$$n = \frac{E\alpha}{h\nu V}$$

where  $V = \frac{\pi D^2}{4} L$  is the volume of cylinder,  $L = 0.1\text{cm}$  is the thickness of sample,  $D$  is the

spot diameter of focused pump beam which is calculated with the focusing formula of Gaussian beam:

$$D = \frac{4\lambda f}{\pi d}$$

where  $f = 25\text{cm}$  is the focal length of lens,  $d = 2\text{mm}$  is spot diameter in front of lens. Combined with the above derivation, the carrier intensity can be calculated.

### Note S3. Density of states of tellurene

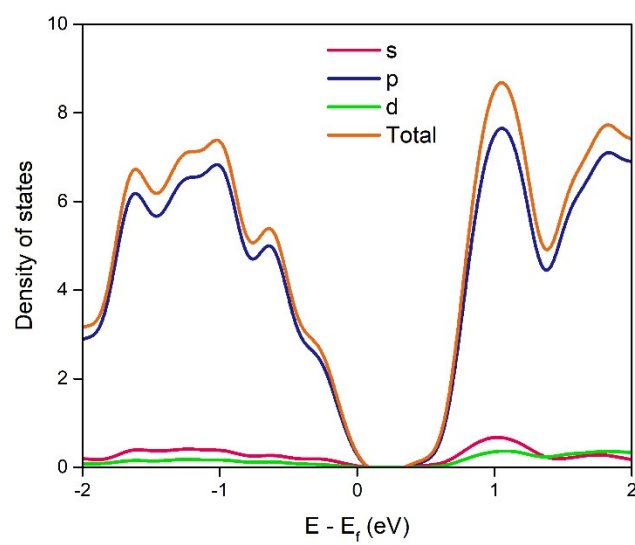

**Figure S2.** Sum and partial density of states of tellurene.
